# Supplementary material
Source: Elsevier journal article supplement (https://www.sciencedirect.com/science/article/pii/S234119291830180X)
Supplement: mmc5 [file S234119291830180X:mmc5.pdf]

# ¿Qué es la hipotermia perioperatoria?

Conozca las causas, consecuencias y cómo evitarla

## La hipotermia perioperatoria se produce por...

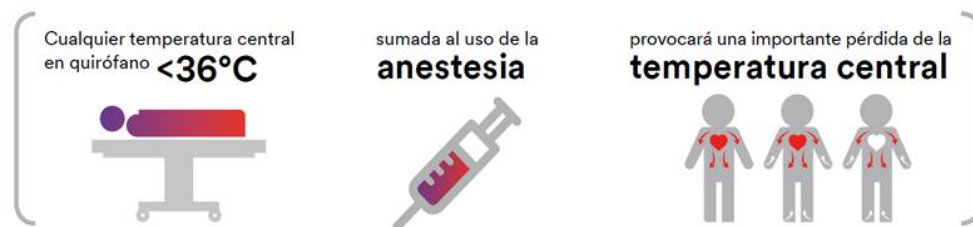

Si no se toman medidas preventivas  
**entre el 50% y el 90%**  
de los pacientes puede sufrir  
hipotermia perioperatoria

### ¿Qué complicaciones puede llegar a sufrir el paciente?

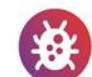

Infección del  
sitio quirúrgico

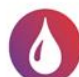

Coagulopatías

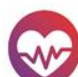

Cardiopatías

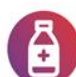

Prolongación y  
alteración del efecto  
de la anestesia

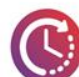

Prolongación de  
estancia en UCI,  
URPA,...

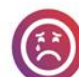

Temblor,  
incomodidad  
térmica y dolor

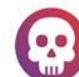

Aumento de la  
mortalidad

Figura 2 (Infografía Pacientes)

## Hipotermia en el quirófano. ¿Por qué sucede?

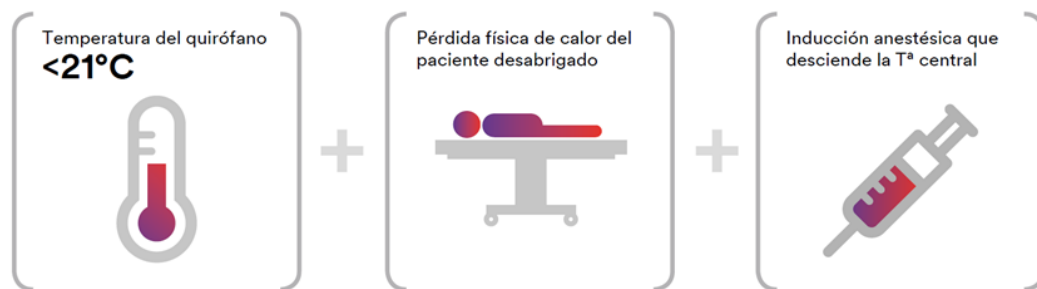

.....

¿Qué sucede al despertar?

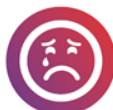

Temblor, frío y dolor

## Soluciones disponibles para mantener la normotermia en el quirófano

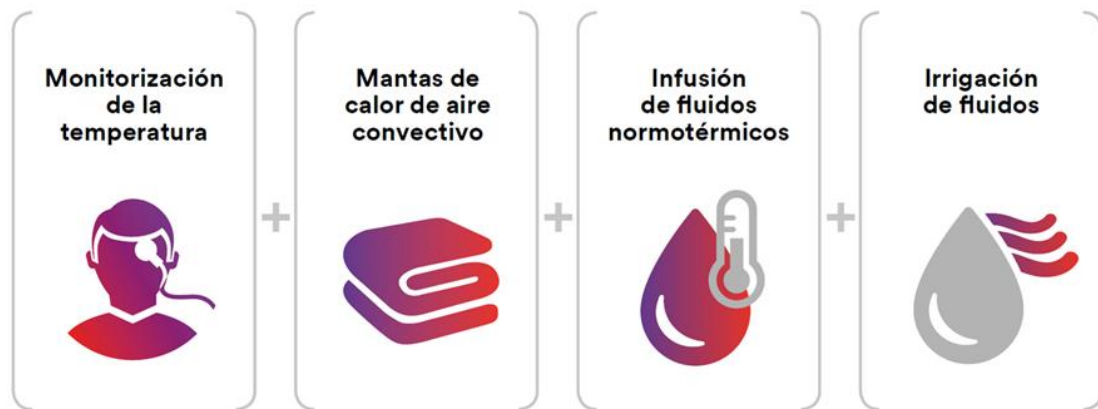

Figura 4 (Infografía Pacientes)
